# Supplementary material
Source: PubMed Central journal article supplement (PMC7126071)
Supplement: rspb20192665supp1.pdf [file rspb20192665supp1.pdf]

Figure S1 Calibration curves of (A) fipronil, (B), fipronil-sulfon, (C) fipronil-sulfide, (D) fipronil-desulfinitil, and (E) fipronil-carboxamide. Recovery is determined by adding 0.4 and 10 ng/g of the quantified components to blank material and quantification is performed by bracketed calibration upon a reference solution of 5 ng/ml. The resulted concentration of the quantified components is assessed against the theoretical concentration. Quantitation parameters are given in the Table below.

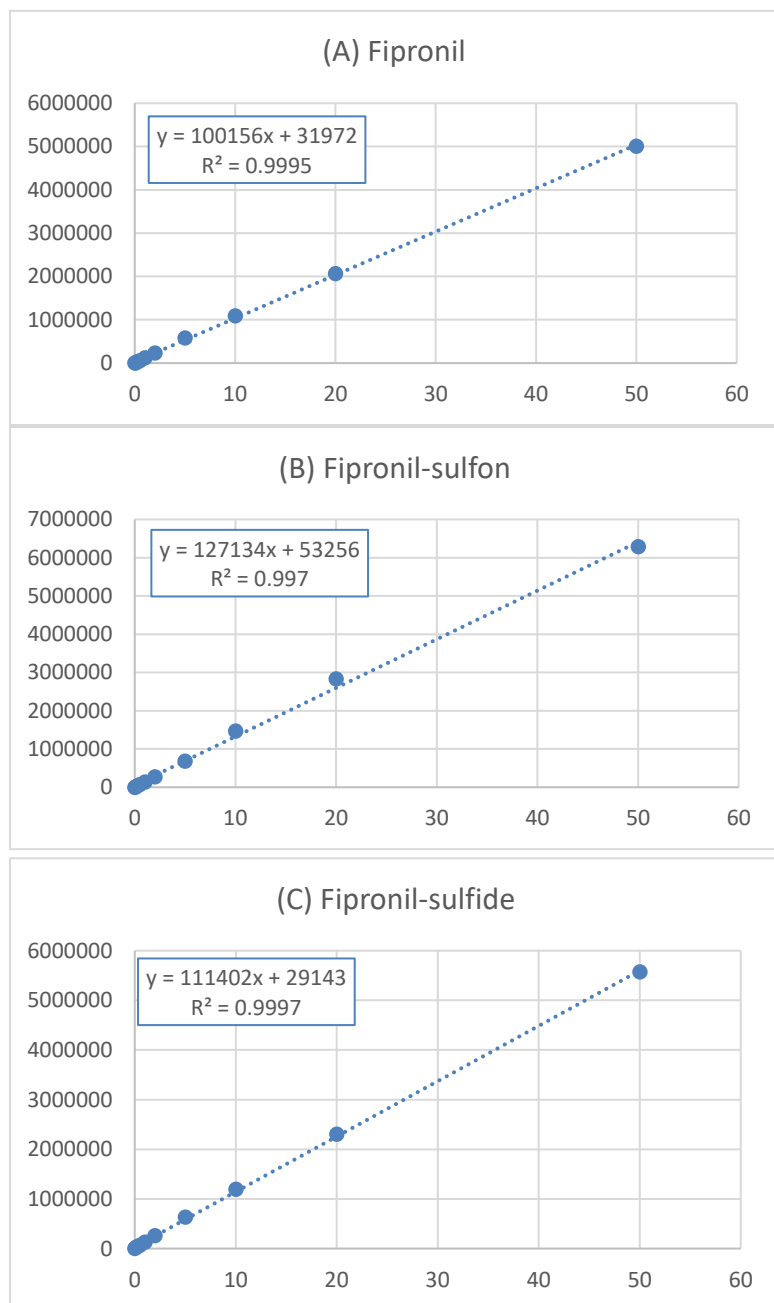

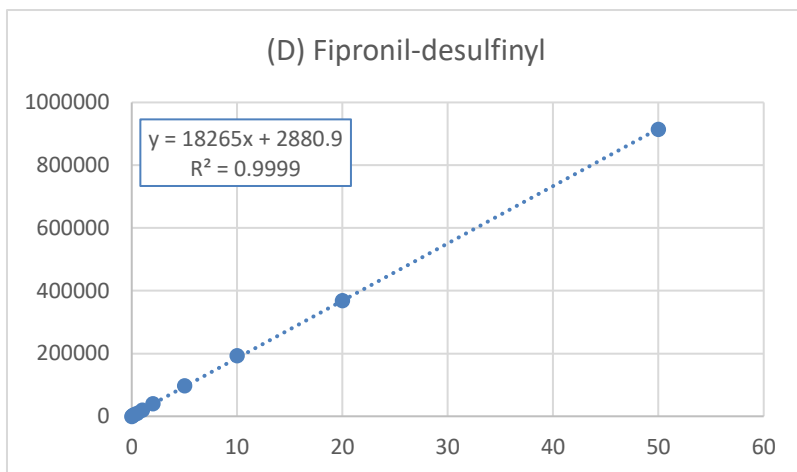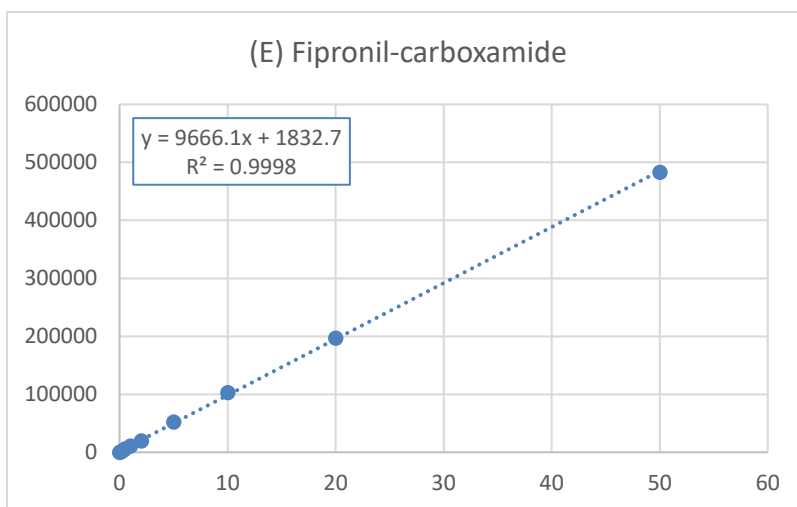

#### Quantitation parameters

| Active substance/metabolite | Recovery | RSD <sub>r</sub> | N= | Range (ng/g) | Guidance value |
|-----------------------------|----------|------------------|----|--------------|----------------|
| Fipronil                    | 76-84%   | 3.9%             | 6  | 0.4-10       | 70-120%        |
| Fipronil-sulfon             | 74-91%   | 8.5%             | 6  | 0.4-10       | 70-120%        |
| Fipronil-sulfide            | 77-95%   | 9.5%             | 4  | 0.4-10       | 70-120%        |
| Fipronil-desulfinyl         | 78-91%   | 7.2%             | 4  | 0.4-10       | 70-120%        |
| Fipronil-carboxamide        | 77-96%   | 7.8%             | 4  | 0.4-10       | 70-120%        |

Additional information.

The obtained recoveries are well within the guidance values (70-120%) as set in SANTE/11813/2017, "Guidance document on analytical quality control and method validation procedures for pesticide residues and analysis in food and feed". When the values are within the guidance values no correction has to be applied to the sample results, therefore no correction was applied.

Identification parameters

| Active substance/metabolite | Retention time (min) | Retention time range (min) | Guidance value (min) | Ion ratio | Ion ratio range | Guidance value |
|-----------------------------|----------------------|----------------------------|----------------------|-----------|-----------------|----------------|
| Fipronil                    | 5.16                 | 5.16-5.17                  | ±0.1                 | 20%       | 17-20%          | ±30%           |
| Fipronil-sulfon             | 5.27                 | 5.27-5.27                  | ±0.1                 | 88%       | 80-105%         | ±30%           |
| Fipronil-sulfide            | 5.21                 | 5.20-5.21                  | ±0.1                 | 92%       | 82-119%         | ±30%           |
| Fipronil-desulfinyl         | 5.10                 | 5.08-5.18                  | ±0.1                 | 28%       | 21-28%          | ±30%           |
| Fipronil-carboxamide        | 4.58                 | 4.57-4.59                  | ±0.1                 | 104%      | 78-111%         | ±30%           |
