# Supplementary material
Source: PubMed Central journal article supplement (PMC7126071)
Supplement: rspb20192665supp2.pdf [file rspb20192665supp2.pdf]

Table S1: Summary of the experimental treatments

| Bioassay                                                                | Larval stage      |                 | Adult stage |                          |
|-------------------------------------------------------------------------|-------------------|-----------------|-------------|--------------------------|
|                                                                         | #plants or dishes | #caterpillars   | # cages     | #female butterflies/cage |
| -----                                                                   |                   |                 |             |                          |
| <i>Whole plant</i>                                                      |                   |                 |             |                          |
| Control                                                                 | 20                | 5               | 19          | 1                        |
| Fipronil                                                                | 19                | 5               | 17          | 1                        |
| <i>Dish (fipronil treatment in <math>\mu\text{g kg}^{-1}</math> DW)</i> |                   |                 |             |                          |
| 0                                                                       | 10                | 10 <sup>a</sup> | 5           | 3                        |
| 1                                                                       | 10                | 10 <sup>a</sup> | 5           | 3                        |
| 2                                                                       | 10                | 10 <sup>a</sup> | 5           | 3                        |
| 4                                                                       | 10                | 10 <sup>a</sup> | 2           | 3                        |
| 8                                                                       | 10                | 10 <sup>a</sup> | 5           | 3                        |
| 16                                                                      | 10                | 10 <sup>a</sup> | 5           | 3                        |
| 32                                                                      | 10                | 10 <sup>a</sup> | 5           | 3                        |
| -----                                                                   |                   |                 |             |                          |

<sup>a</sup> this number was reduced to 5 at day 9.
